# Supplementary material for: Could the Construct of Modern-Type Depression Predict Internet Gaming Disorder in Italian Video Gamers? A Case–Control Study
Source: MDPI journal article supplement (doi:10.3390/brainsci14010048), 2024-01-03
Supplement: s1 [file s1]

**Supplementary File to Table 6.** Multiple Linear Regression with TACSS-22 total score (as dependent variable) - other not significant variables excluded by the model.

|                                            | $\beta$ | t      | p-value | Tolerance | VIF   |
|--------------------------------------------|---------|--------|---------|-----------|-------|
| <b>MOGQ "Socialization" subscale</b>       | -0.043  | -0.893 | 0.372   | 0.706     | 1.417 |
| <b>MOGQ "Coping" subscale</b>              | 0.043   | 0.711  | 0.477   | 0.457     | 2.186 |
| <b>MOGQ "Ability Development" subscale</b> | -0.044  | -0.902 | 0.367   | -0.679    | 1.472 |
| <b>MOGQ "Recreation" subscale</b>          | 0.045   | 0.965  | 0.335   | 0.747     | 1.339 |
| <b>MOGQ total scale</b>                    | -0.018  | -0.185 | 0.853   | 0.181     | 5.518 |

TACS-22: Tarumi's Modern-Type Depression Trait Scale; MOGQ: Motives for Online Gaming Questionnaire.
